# Supplementary material
Source: Springer Nature journal article supplement (https://www.springermedizin.de/resource/supplementary/12913_2012_2186_MOESM10_ESM.pdf/9529876)

**Study, Year, Operation, Education Level OR (95% CI)**

Hanchate, 2008 -TKA, $\geq$ high school 1.37 (1.10-1.72)

Hanchate, 2008 -TKA, $\geq$ high school\* 1.45 (1.15-1.82)

Hawker, 2006 -THA/TKA, $=$ high school 1.18 (0.87-1.59)

Hawker, 2006 -TKA/THA, $>$ high school 1.63 (1.13-2.33)

Steel, 2008 -TKA/THA, $\geq$ College 1.53 (1.00-2.38)

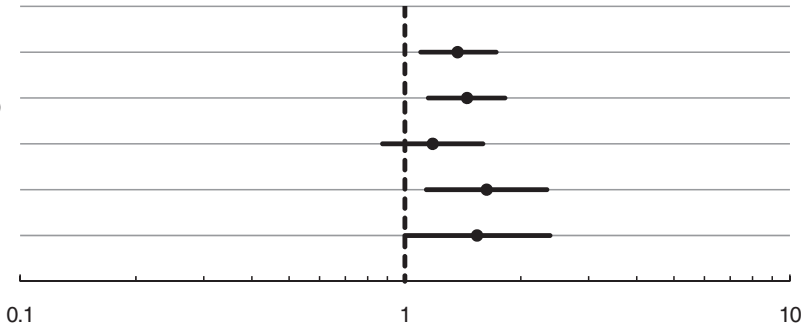

Supplement: MOESM10 [file 9529876]
